# Supplementary material
Source: PubMed Central journal article supplement (PMC2700900)
Supplement: 0900178106_0900178106SI.pdf [file 0900178106_0900178106SI.pdf]

# Supporting Information

Masuda-Nakagawa et al. 10.1073/pnas.0900178106

## SI Text

**Immunocytochemistry.** The CNS of wandering third-instar larvae was dissected in phosphate buffer (PBS), fixed, and labeled as described (1). Primary antibodies were: mouse 4F3 anti-Dlg (2) (1:200), rabbit anti-GFP (1:1,000; Molecular Probes), and mouse anti-Myc 9E10 (3) (1:20). Secondary antibodies were anti-mouse Alexa 647 (1:200; for anti-Dlg) and anti-rabbit Alexa 488 (1:200; for anti-GFP) or in case of *Or83b-Myc*, anti-mouse 568 (1:200; for both anti-Myc and anti-Dlg) and anti-rabbit Alexa 488 (1:200 for anti-GFP). Antibody incubations were performed on a rotating shaker for 2 nights at 4 °C. Brains were kept in 50% glycerol overnight and mounted in 50% glycerol in PBS under a coverslip supported by strips of electric insulation tape 0.2 mm thick × 19 mm wide × 10 mm long, to protect the anatomy of the CNS.

**Specimen Orientation and Confocal Immunomicroscopy.** Orientation of the larval AL was defined relative to the body axis rather than the neuraxis. Accordingly, the AL is situated at the anterior edge of the brain, similar to the adult fly (Fig. S2). Images of the AL were taken in the frontal plane of the brain, from anterior to posterior. Standardized orientation was obtained by adjusting specimens under the microscope to include in the same optical section the most anterior levels of the AL and the prominent anterior protrusion of the MBs, the lateral appendix, close to the intersection between the MB lobes (Fig. S2). Optical sections usually contained the same levels of the left and right ALs and other conspicuous brain structures (such as the MB lobes). Occasional tilt, i.e., a difference of 2–4 optical sections between corresponding left and right structures, or a rotation of the brain around the mediolateral (ML) axis, which caused the AL to be included in more anterior sections than the MB lateral appendix, were taken into account for glomerular identification. Neither nc82 anti-BRP (4), a standard marker for adult AL glomeruli (5), nor labeling AL glia using *Nrv2-GAL4* (6) or anti-Draper (7) improved resolution of glomerular boundaries beyond that seen using anti-Dlg.

Stacks of confocal pictures were taken either by using a Bio-Rad MRC 1024 mounted on a Nikon Eclipse E800 with a Plan Apo 60x/1.40 Oil Dic H /0.17 WD 0.21 objective and voxel size  $0.08 \times 0.08 \times 1.0 \mu\text{m}$  ( $x, y, z$ ), or a Zeiss LSM510 with a C-Apochromat 40x/NA1.2 W objective and voxel size  $0.23 \times 0.23 \times 0.69 \mu\text{m}$  ( $x, y, z$ ). Images were cropped and processed by using ImageJ (<http://rsb.info.nih.gov/ij/>) and Photoshop (Adobe Systems) software. Minimum and maximum levels and gamma settings were adjusted across the entire image to improve contrast between glomeruli and background, and in most images a median filter (radius 1 pixel) was used to reduce background noise.

3D glomerular reconstruction of the larval AL was based on the patterns of OSN terminals visualized by 22 *OrX-GAL4* lines in at least 12 ALs, from 6 or more brains per line. Center positions were estimated by placing the center of each glomerulus from each individual in a grid of 17 levels each in the dorsoventral (DV) and ML levels and 7 levels in the anteroposterior (AP) axis. The lengths of the DV ( $31.6 \pm 3.6 \mu\text{m}$ ) and ML ( $32.6 \pm 3.5 \mu\text{m}$ ) axes of the larval AL exceed that of the AP ( $23.5 \pm 1.3 \mu\text{m}$ ) axis (mean  $\pm$  SD;  $n = 241$ ). For a 3D, outlines of individual glomeruli were drawn as a multilayered tif file in 27 1- $\mu\text{m}$  optical sections in the AP axis. Glomerular shapes and sizes were drawn by averaging the most representative OSN terminal patterns. A 3D reconstruction of the averaged AL map was generated by using Amira (Visage Imaging GmbH, Düssel-

dorf, Germany), with each section replicated a total of 5 times along the  $z$  axis before interpolation. ALs in the left hemisphere were mirrored to appear as if they were in the right hemisphere. 3D reconstruction of the calyx map was performed by using 0.6- $\mu\text{m}$  sections of a single calyx labeled with anti-Dlg and *UAS-nsyb::GFP* under control of *GHI46-GAL4*.

**Imaging Neuronal Activity in Calyx.** The parental *GC56;OrX-GAL4;or83b<sup>1</sup>* stocks used for the imaging crosses were verified by visualizing GFP expression in the AL (Fig. S8) and showed similar morphology of labeling in AL glomeruli as the same *OrX-GAL4* insertions in an *or83b<sup>+</sup>* background (Figs. S1 and S5).

GCaMP fluorescence was visualized by using a CSU22 spinning disc confocal (Yokogawa Electric Corporation) mounted on an Axioplan 2 microscope (Zeiss), and captured with a CoolSNAP HQ CCD camera (Photometrics). Exposure times were 200 ms and frame rates were 1 per 270 ms. Acquisition and camera control was carried out by using Slidebook (version 4.1.0.6; Intelligent Imaging Innovations). Before acquisition, larvae were exposed to a stream of air at 60 mL/min, delivered through Tygon tubing [internal diameter (ID) 1 mm; Saint Gobain Corporation]. Air was pumped from an OP-N026 aquarium pump (Iwaki) through a series of 3 1-L bottles containing cotton wool, charcoal, and water connected by Tygon tubing (ID 7 mm), to an RK1200 flowmeter (Kofloc). Air from the flowmeter passed through Teflon tubing (ID 2 mm; DuPont) to an MTV-3-NM6 3-way valve (Takasago), a bubbler containing 2 mL of mineral oil, a Warner MP-2 manifold, and a needle (ID 0.8 mm) directed at the larva. Initiation of imaging triggered a TTL pulse from the camera to a Master-8-cp stimulator (AMPI), which after a delay of 2 s, switched the 3-way valve to divert the airflow from the bubbler with mineral oil, to an alternative bubbler with odorant diluted to 10% in paraffin oil, from where it passed to the manifold and the larva. Odorant was delivered for 2 s, after which the 3-way valve was switched back to the nonodorant channel. Ethyl acetate (ACS reagent  $\geq 99.5\%$ ), acetophenone (ReagentPlus grade, 99%) and paraffin oil (IR spectroscopy grade) were obtained from Sigma–Aldrich.

To display  $\Delta F$  and calculate  $\Delta F/F$ , Slidebook files were converted to 8-bit Quicktime movies (Codec H.264, high quality). Images were corrected for fluorescence decay by using the ImageJ plug-in Stacks T-functions Bleach Correction ([www.macbiophotonics.ca/imagej/t.htm](http://www.macbiophotonics.ca/imagej/t.htm)). Where necessary, the first or last few frames were removed before bleach correction to improve the fit to exponential decay. A resting fluorescence image was generated by averaging 3–6 unstimulated frames, and this was subtracted from each frame of the bleach-corrected movie to generate a movie of  $\Delta F$ . Pixel noise was reduced by filtering images with a Gaussian Blur (radius 1 pixel). The movie was displayed by using the Rainbow2 lookup table (LUT), and the minimum and maximum levels were adjusted to remove most low-level random fluorescence fluctuations between frames and to use most of the LUT range for display. To plot a time course of  $\Delta F/F$ , a region of interest (ROI) was defined along the edge of an active glomerulus in an unprocessed 8-bit movie, and a time course of average fluorescence was calculated.  $\Delta F/F$  was calculated relative to the starting fluorescence, normalized to the fluorescence decay in an ROI in a large unresponsive region of the preparation. A variable lag phase was observed between the programmed odor pulse and the calyx response, presumably caused by variability in the orientation of the dissected larval preparation relative to the odor stream. To allow for this,  $\Delta F/F$

traces from different individuals were aligned around the time point at which the steepest increase in  $\Delta F/F$  was observed; and the average period of the odor pulse was shown on graphs that plotted the average time course of  $\Delta F/F$ .

In the absence of any functional OSN input (larvae carrying *GHI46-GAL4* and *UAS-GCaMP1.3* in an *or83b<sup>1</sup>* mutant background), no activity was ever observed in the calyx in response to either ethyl acetate (16 calyces observed in 11 different larvae) or acetophenone (19 calyces from 10 larvae), confirming that

calyx activity depended on OSN input. In a number of these preparations, a *GHI46*-expressing projection beneath the calyx showed weak activity ( $\Delta F/F \approx 4\%$ ) in response to both ethyl acetate and acetophenone. Because *GHI46-GAL4* is expressed also outside PNs and the *or83b<sup>1</sup>* mutation abolishes all detectable olfactory input from OSNs (8), this effect was likely caused by nonolfactory effect of odor delivery. However, we could not trace the origin of the activated projection.

1. Masuda-Nakagawa LM, Tanaka NK, O'Kane CJ (2005) Stereotypic and random patterns of connectivity in the larval mushroom body calyx of *Drosophila*. *Proc Natl Acad Sci USA* 102:19027–19032.
2. Parnas D, Haghighi AP, Fetter RD, Kim SW, Goodman CS (2001) Regulation of postsynaptic structure and protein localization by the Rho-type guanine nucleotide exchange factor dPix. *Neuron* 32:415–424.
3. Evan GI, Lewis GK, Ramsay G, Bishop JM (1985) Isolation of monoclonal antibodies specific for human *c-myc* protooncogene product. *Mol Cell Biol* 5:3610–3616.
4. Wagh DA, et al. (2006) Bruchpilot, a protein with homology to ELKS/CAST, is required for structural integrity and function of synaptic active zones in *Drosophila*. *Neuron* 49:833–844.
5. Laisue PP, et al. (1999) Three-dimensional reconstruction of the antennal lobe in *Drosophila melanogaster*. *J Comp Neurol* 405:543–552.
6. Sun B, Xu P, Salvaterra PM (1999) Dynamic visualization of nervous system in live *Drosophila*. *Proc Natl Acad Sci USA* 96:10438–10443.
7. Freeman MR, Delrow J, Kim J, Johnson E, Doe CQ (2003) Unwrapping glial biology: Gcm target genes regulating glial development, diversification, and function. *Neuron* 38:567–580.
8. Fishilevich E, et al. (2005) Chemotaxis behavior mediated by single larval olfactory neurons in *Drosophila*. *Curr Biol* 15:2086–2096.



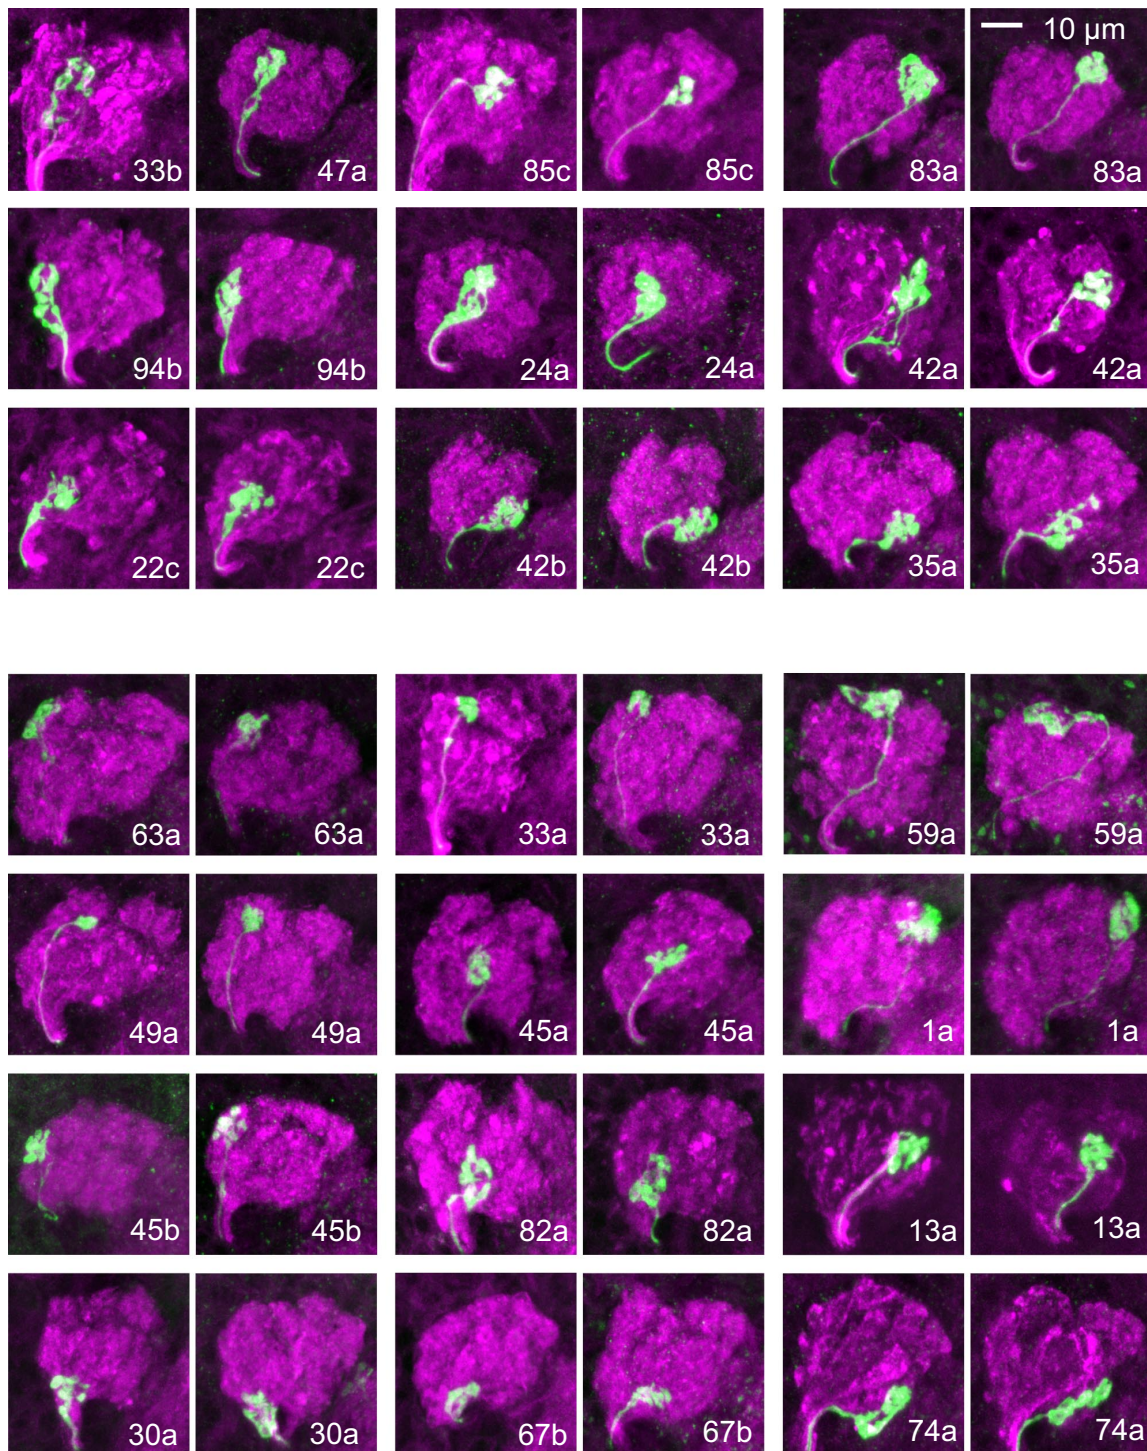

**Fig. S1.** OSN terminals in the larval AL. Larvae carrying *OrX-GAL4*, *UAS-GFP*, and *Or83b-Myc* were labeled by using anti-GFP (green) to visualize OSN projections and anti-Dlg and anti-Myc (both magenta) to visualize the organization of the AL. Shown are projections of confocal sections; in this and all subsequent figures, AL sections are viewed from anterior (for orientation see Fig. S2), with dorsal to the top and lateral to the left. The panels on top show glomeruli in the anterior part of the AL, the lower panels show glomeruli in the middle and posterior parts. For each *OrX-GAL4* line, 2 examples are shown illustrating the type of variability observed; for *Or33b* and *Or47a*, which are coexpressed in the same OSN, only 1 example each is shown. The arrangement of individual panels in the top and bottom groups reflects the location of the glomeruli inside the AL. The sensory terminals consist of branches and varicosities of variable numbers, size, and shape.

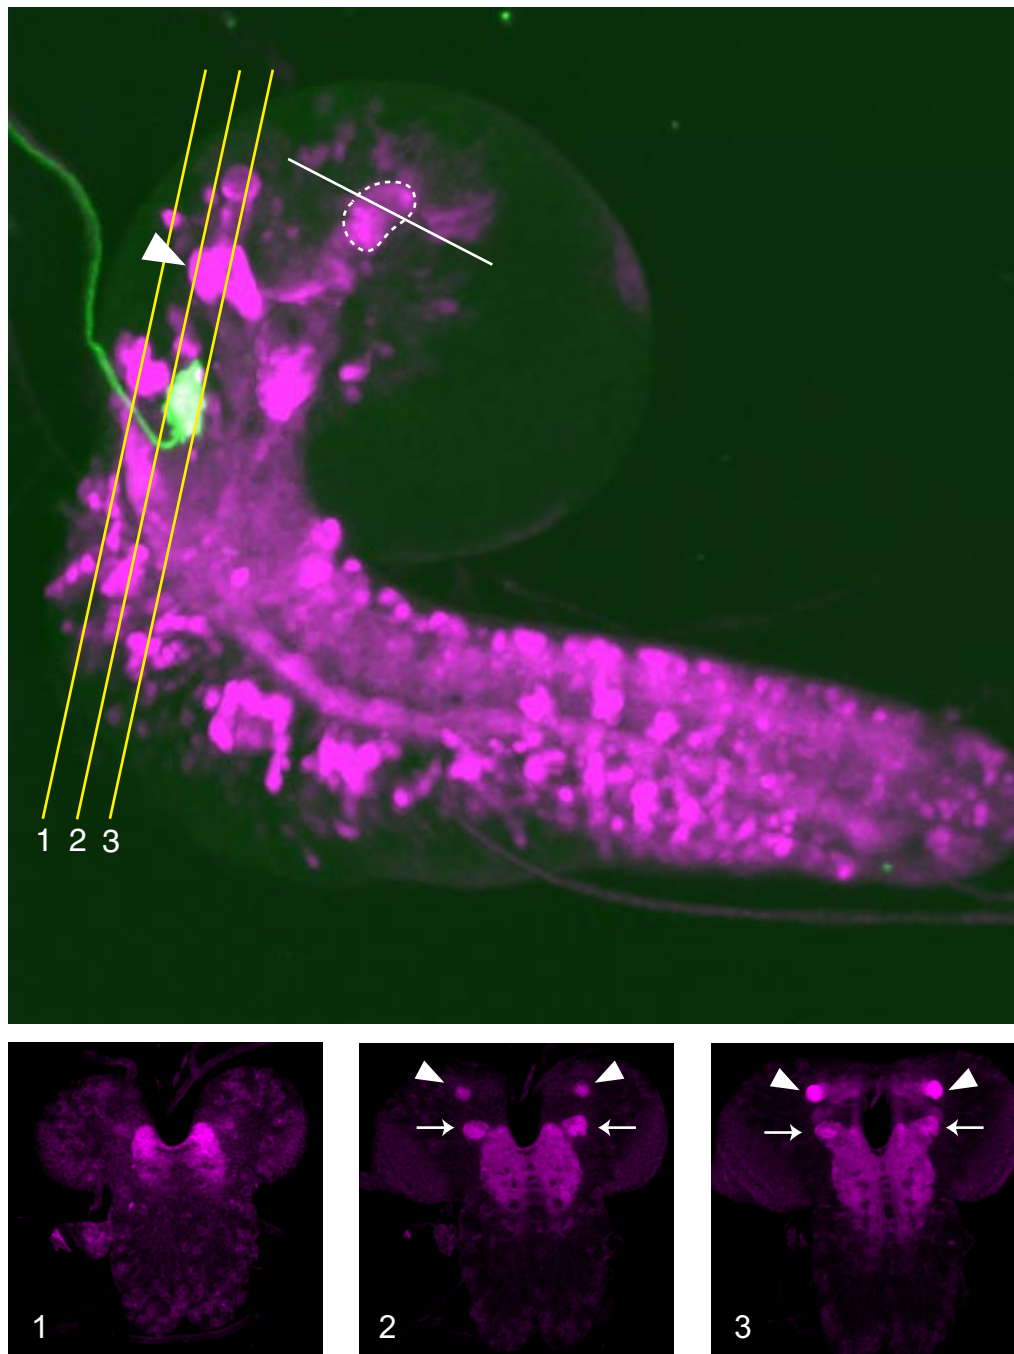

**Fig. S2.** Lateral view of the larval CNS showing the projections of OSNs in the AL (*Or83b-GAL4xUAS-GFP*; green) in a background stained by *Gad1-RFP* (magenta) ([www.ncbi.nlm.nih.gov/projects/geo/query/acc.cgi?acc=GSE1048](http://www.ncbi.nlm.nih.gov/projects/geo/query/acc.cgi?acc=GSE1048)). The yellow and white lines refer to the confocal planes used, respectively, for mapping OSN terminals in the AL, and PN projections in the MB calyx (stippled contour). The panels below correspond to the 3 yellow lines. In the standard orientation used for mapping OSN terminals, confocal sections (2, 3) comprised both the AL (arrows) and the lateral appendix of the MBs (arrowheads).









### Anterior View

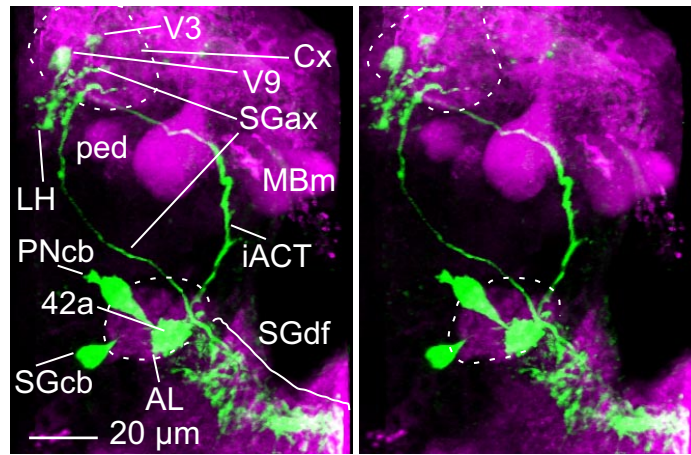

### Medial View

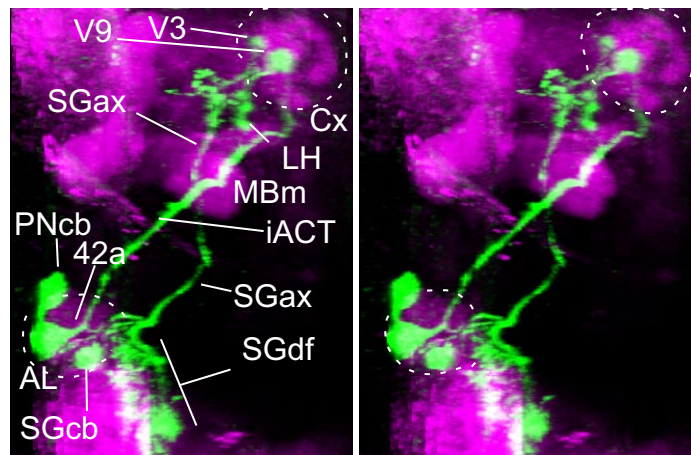

**Fig. S6.** Innervation of calyx glomerulus V3 by a neuron originating in the subesophageal ganglion. The panels are stereo pair images of the preparation used in the left pair of panels showing AL glomerulus 42a and calyx glomerulus V9 in Fig. 2, viewed from approximately anterior (top pair) and medial (bottom pair) directions. Two neurons (green) innervate the calyx: a PN projects from its cell body (PNcb) to AL glomerulus 42a and via the inner antennocerebral tract (iACT) to calyx glomerulus V9 and the lateral horn (LH); a non-PN neuron projects from its cell body (SGcb) to its dendritic field (SGdf) in the subesophageal ganglion and via its axon (SGax) to calyx glomerulus V3. The calyx (Cx), AL (broken lines) and other neuropil are visualized using anti-Dlg (magenta). MBm, mushroom body medial lobe; ped, pedunculus. Nonspecific staining of the green channel on some parts of the brain surface has been removed before 3D reconstruction, to avoid obscuring the internal projections of neurons expressing *mCD8::GFP*. A complete rotation of this reconstruction around the DV axis is shown in [Movie S4](#).





*GC56; Or42a-GAL4; or83b<sup>1</sup>*

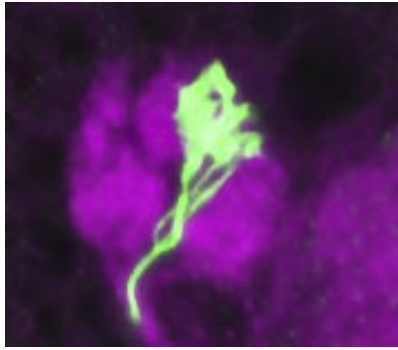

*GC56; Or45b-GAL4; or83b<sup>1</sup>*

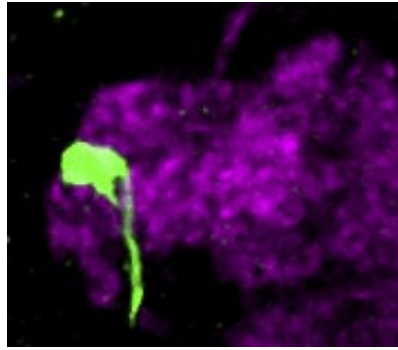

*GC56; Or47a-GAL4; or83b<sup>1</sup>*

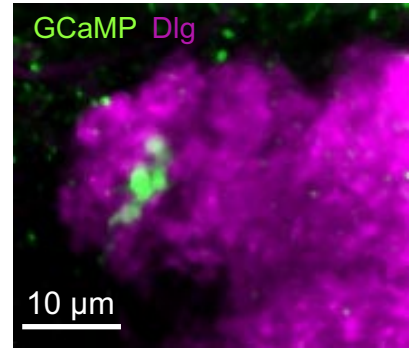

**Fig. S8.** Expression of GFP in the expected AL glomeruli in the *UAS-GCaMP1.3(GC56);OrX-GAL4;or83b<sup>1</sup>* parental stocks used for the imaging crosses.

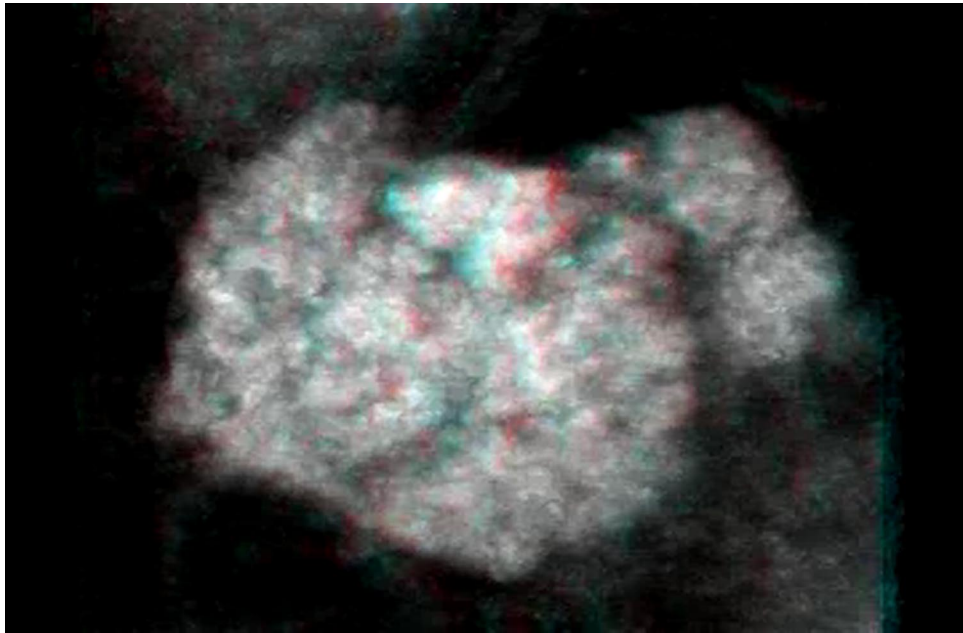

**Movie S1.** A complete rotation around the DV axis of the 3D reconstruction of a larval AL shown in [Fig. S4B](#).

[Movie S1 \(MOV\)](#)



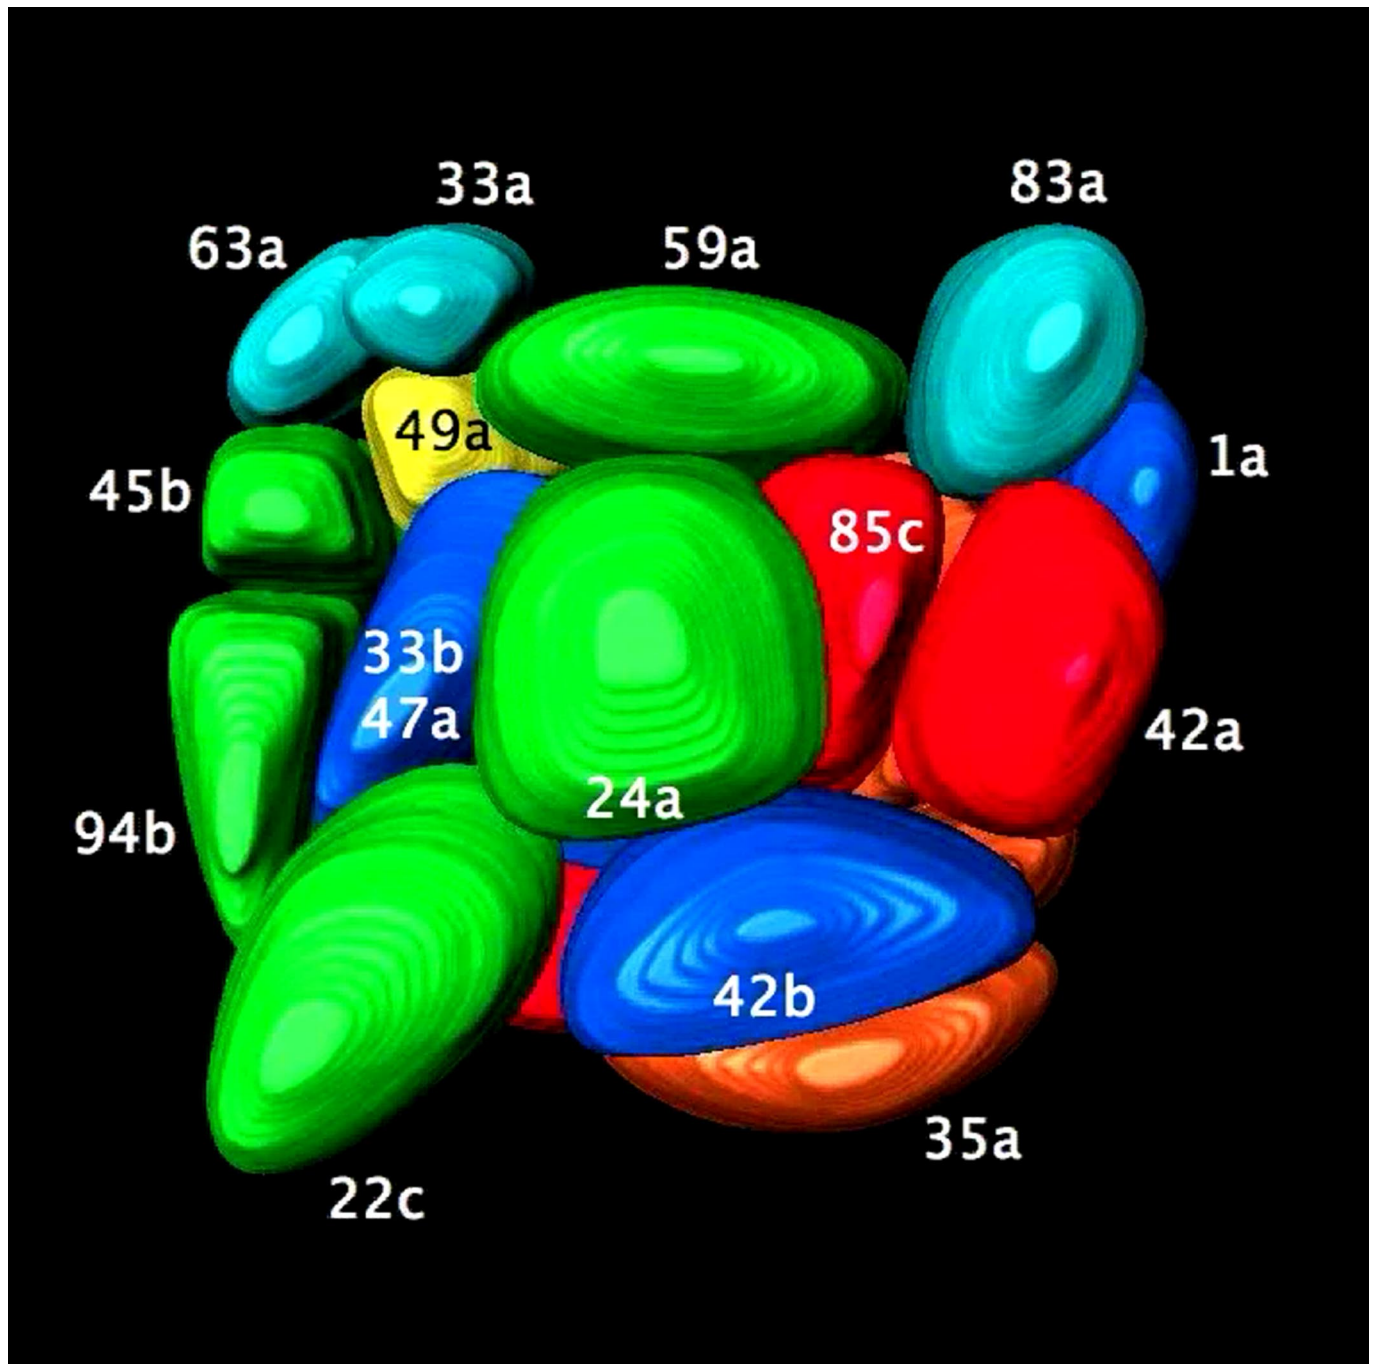

Movie S2. A complete rotation around the DV axis of the 3D AL model shown in Fig. 1E.

[Movie S2 \(MOV\)](#)

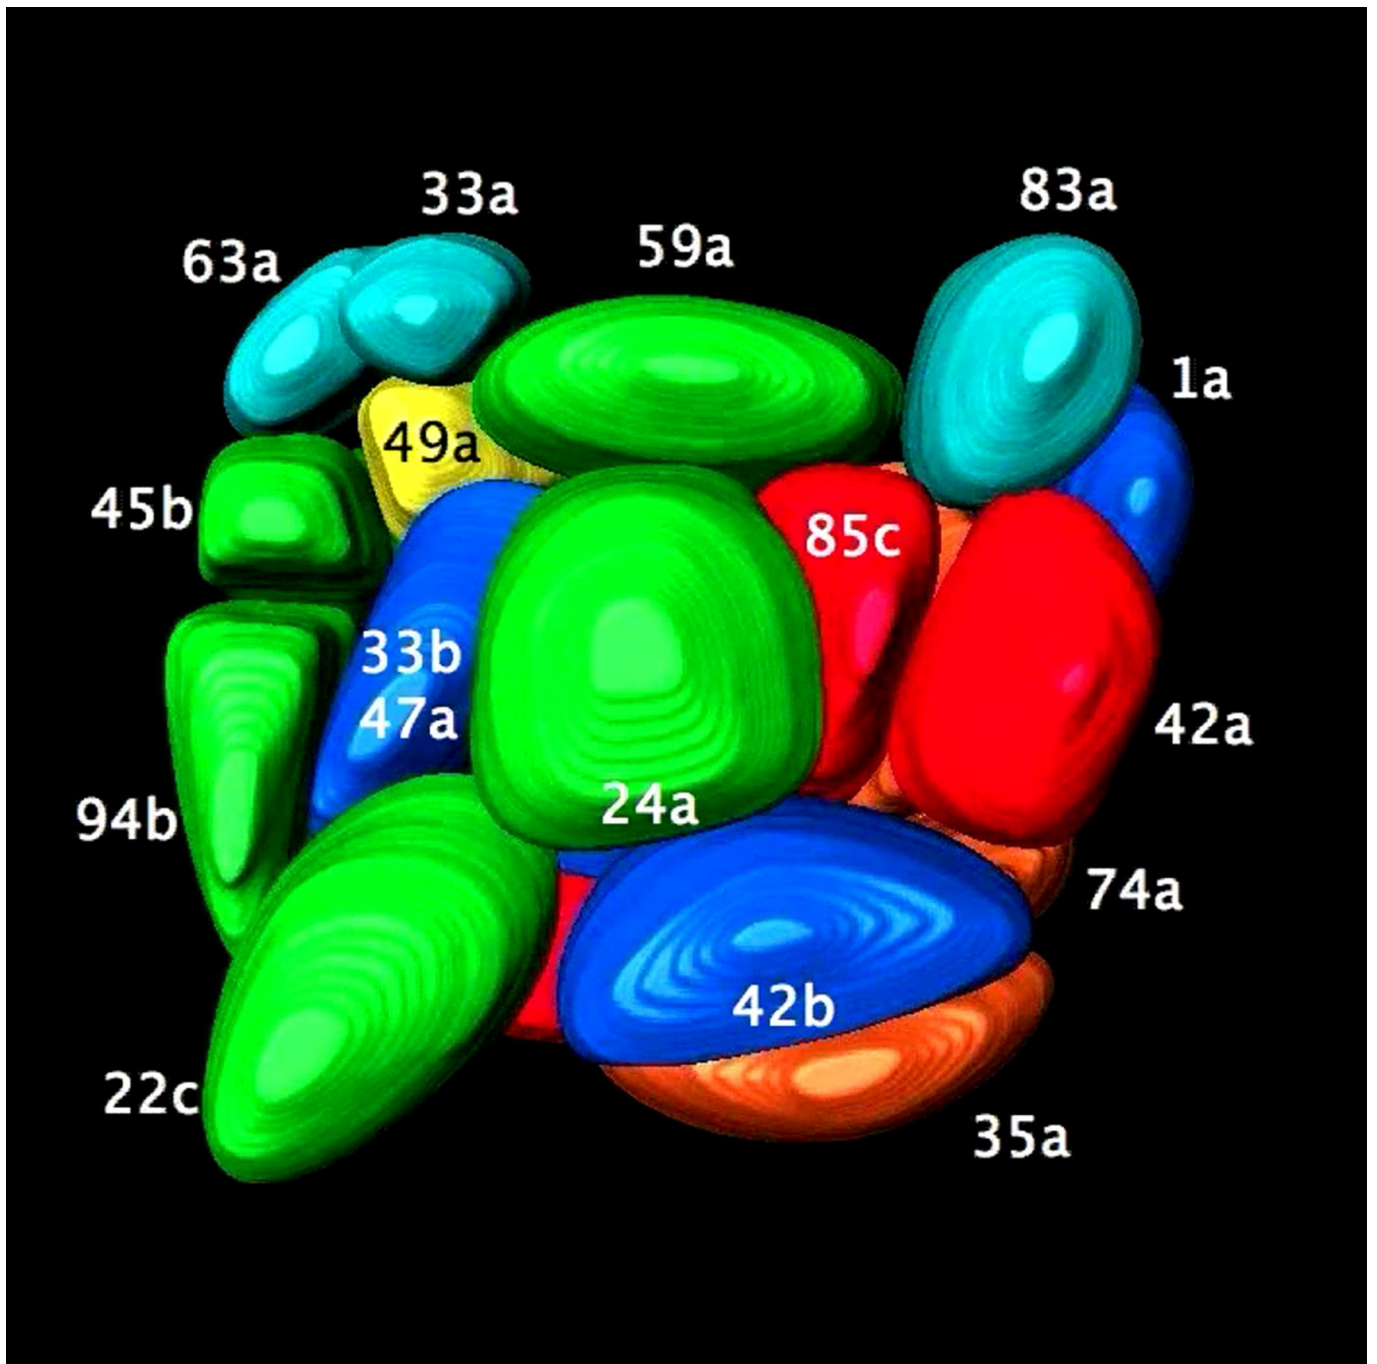

Movie S3. A complete rotation around the ML axis of the 3D AL model shown in Fig. 1E.

[Movie S3 \(MOV\)](#)

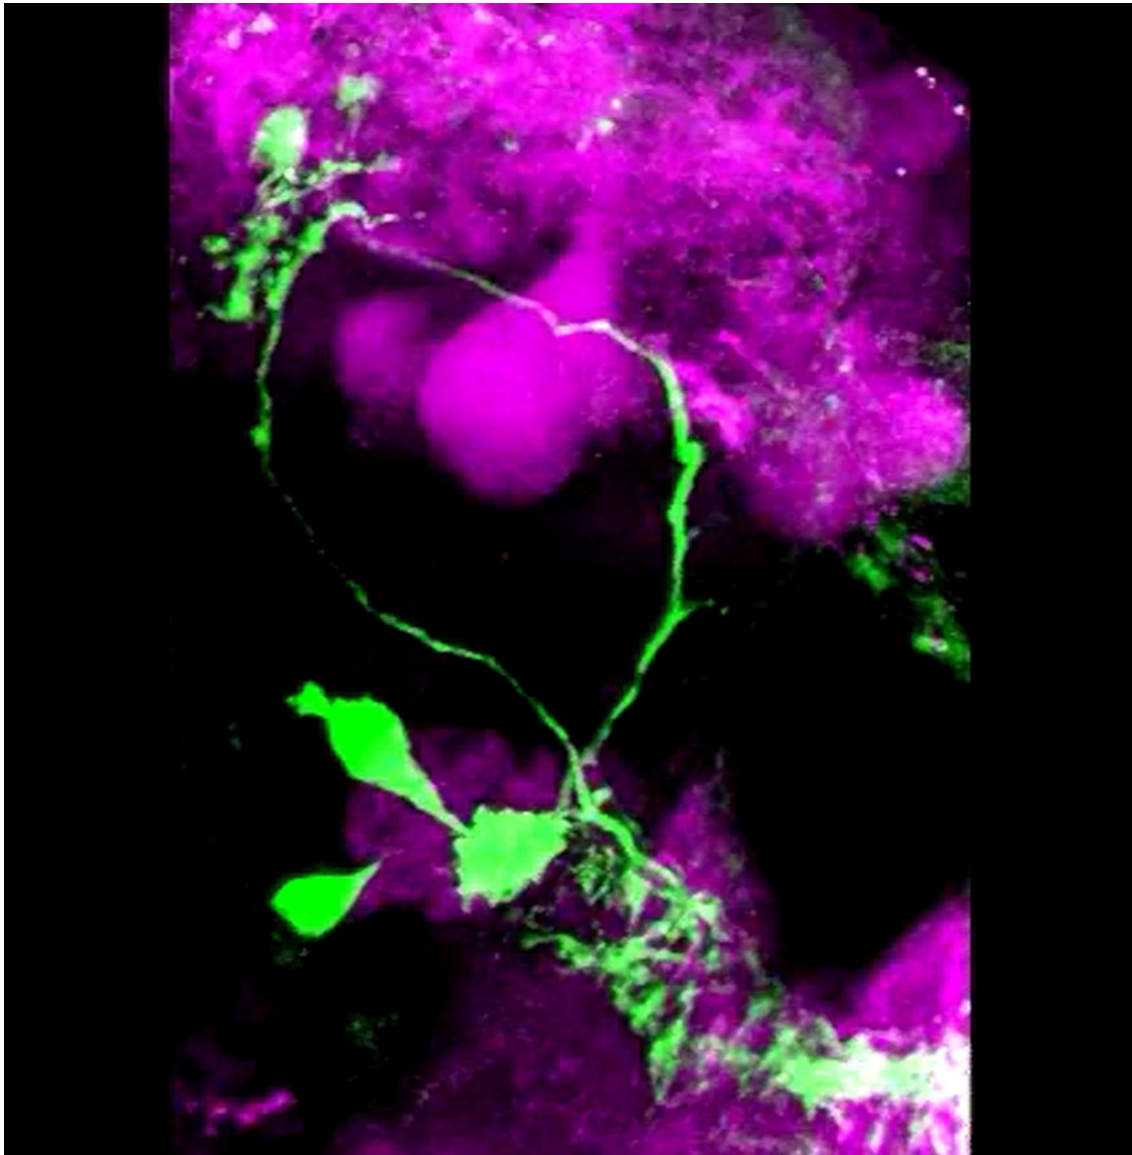

Movie S4. A complete rotation around the DV axis of the brain hemisphere shown in Fig. S6.

[Movie S4 \(MOV\)](#)



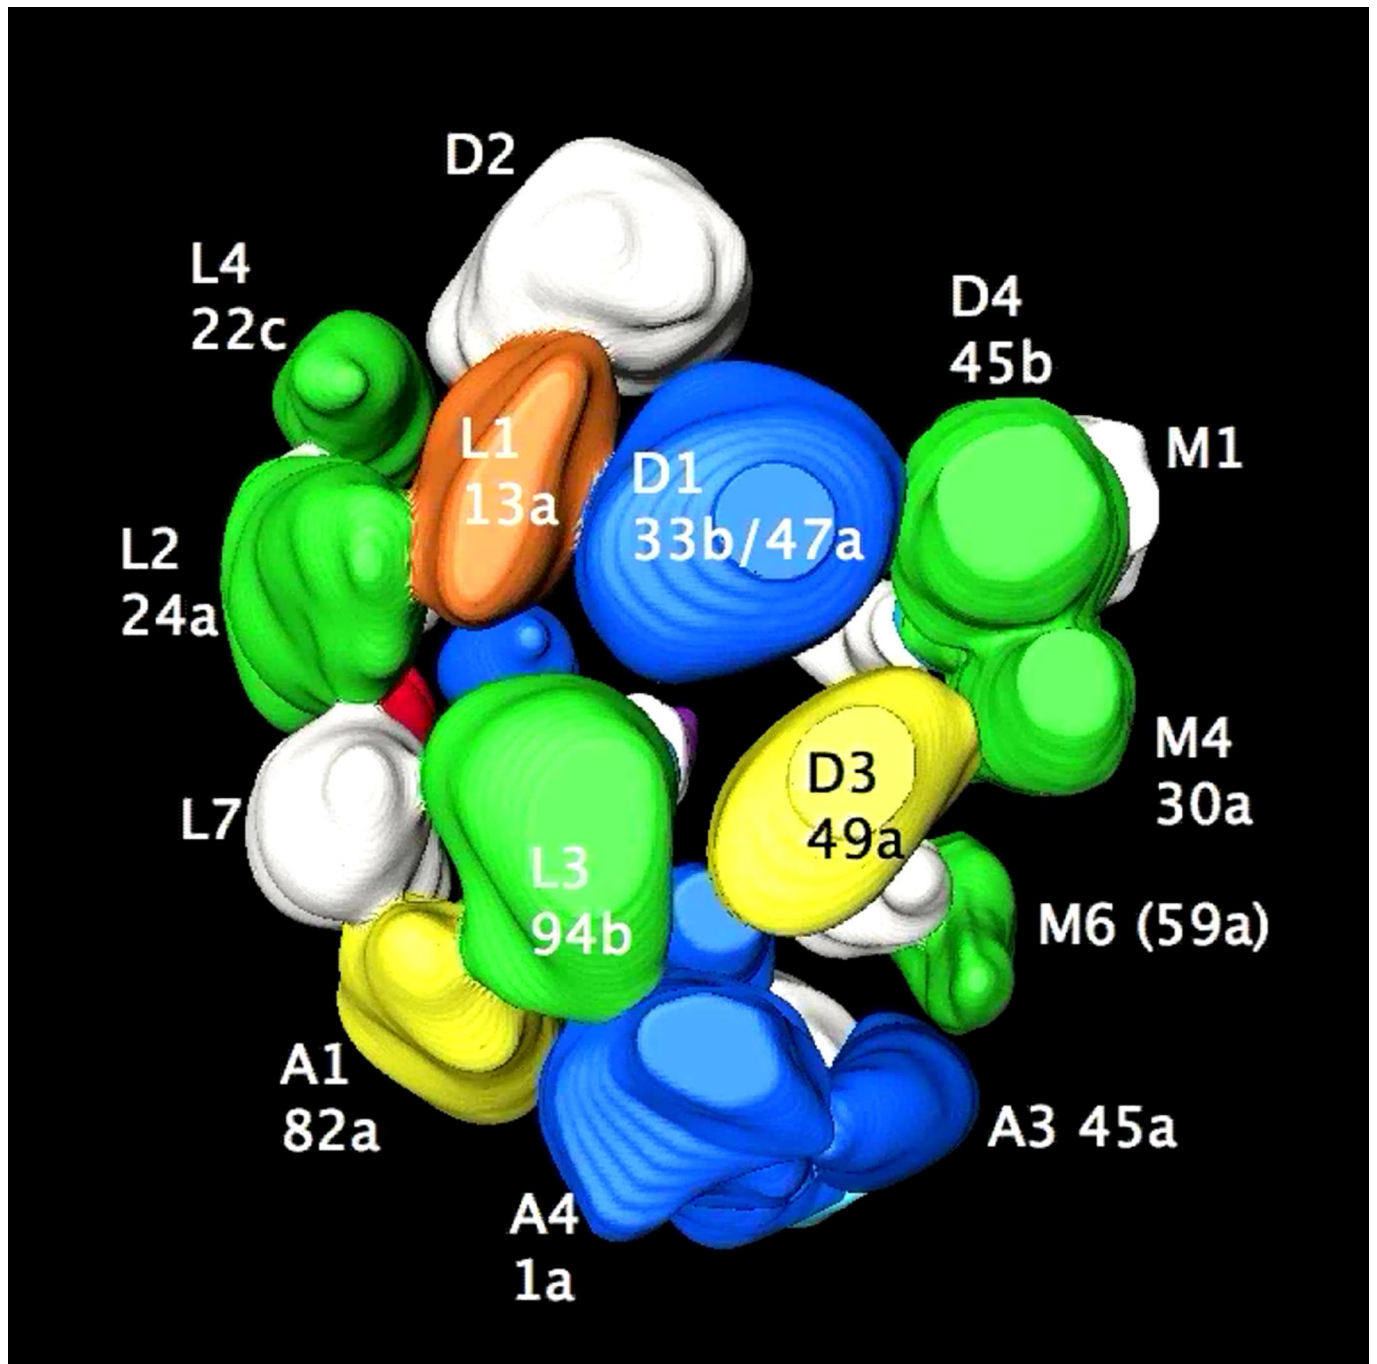

Movie S5. A complete rotation around the AP axis of the calyx model shown in Fig. 3.

[Movie S5 \(MOV\)](#)

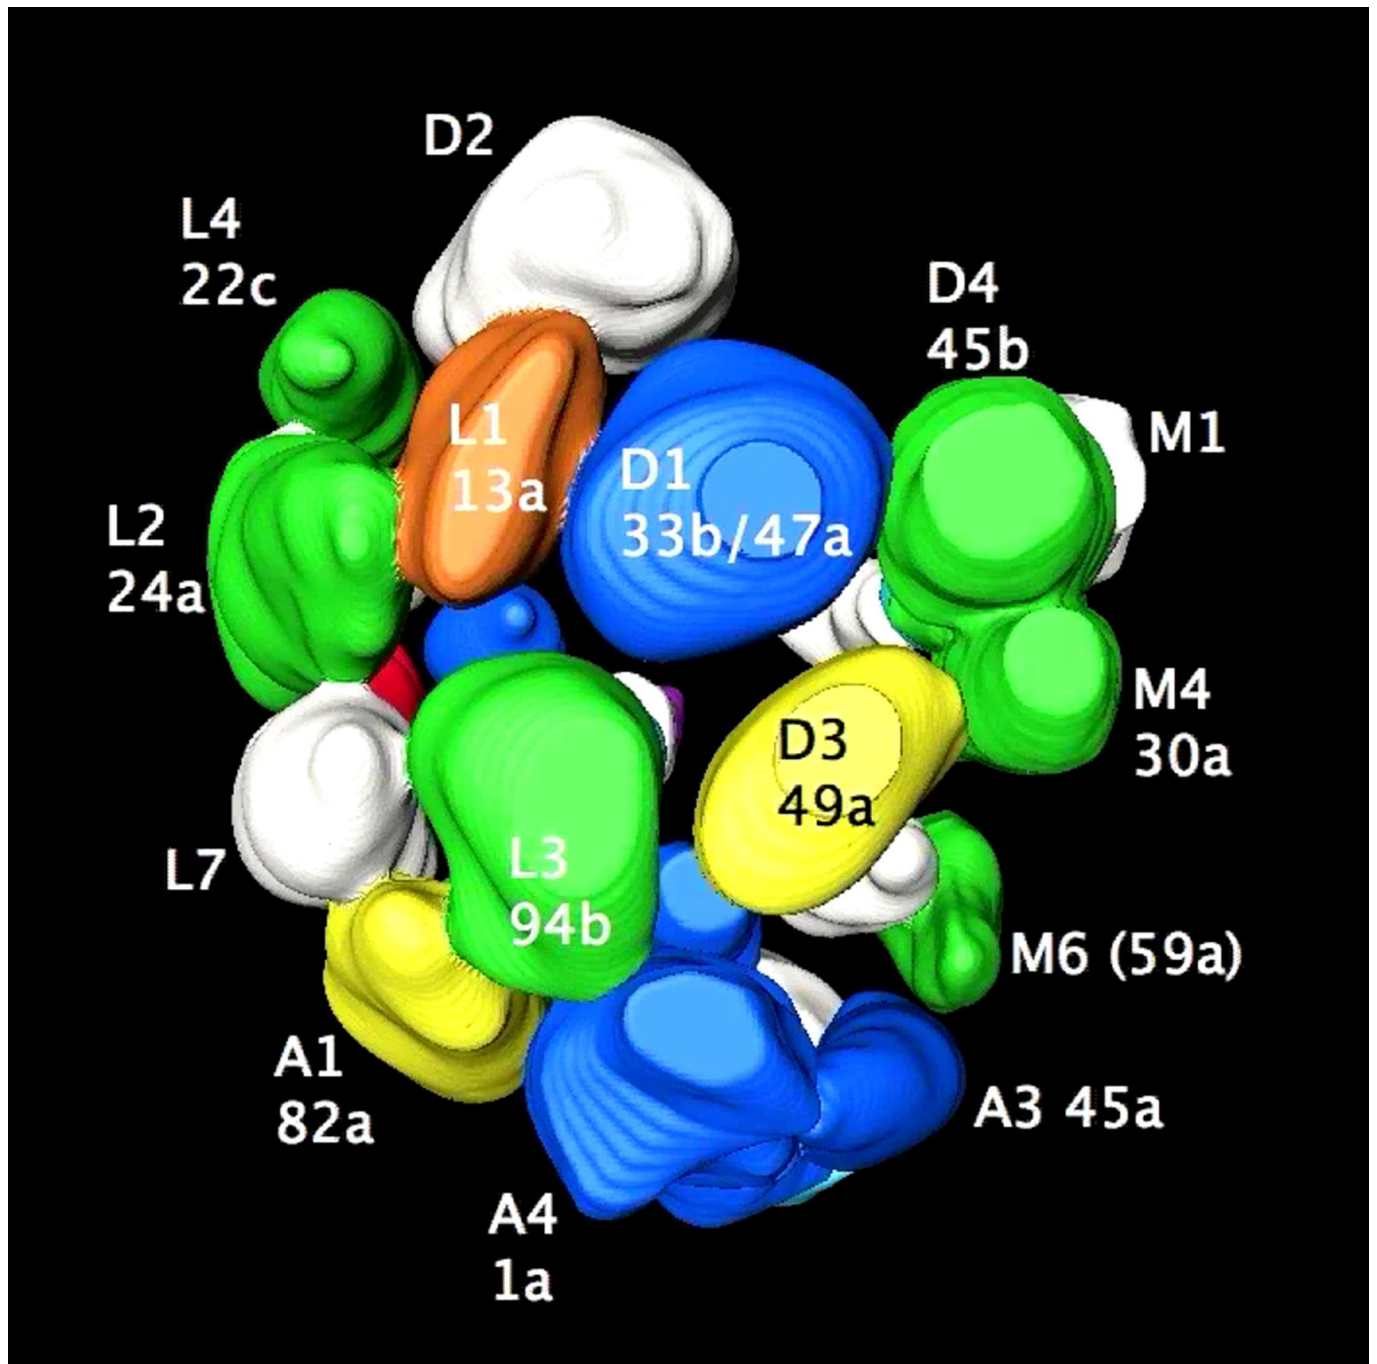

Movie S6. A complete rotation around the ML axis of the calyx model shown in Fig. 3.

[Movie S6 \(MOV\)](#)

Table S1. Positions of individual larval AL glomeruli

| Glomerulus | Lateral-medial | Ventral-dorsal | Anterior-posterior | <i>n</i> |
|------------|----------------|----------------|--------------------|----------|
| 1a         | 27.5 ± 1.7     | 24.7 ± 1.6     | 17.0 ± 1.5         | 12       |
| 13a        | 22.0 ± 0.0     | 15.8 ± 0.6     | 18.8 ± 1.9         | 12       |
| 22c        | 11.5 ± 2.6     | 14.9 ± 1.3     | 6.7 ± 1.8          | 13       |
| 24a        | 16.0 ± 2.6     | 18.5 ± 2.7     | 6.3 ± 0.9          | 12       |
| 30a        | 4.0 ± 0.0      | 4.7 ± 1.3      | 16.5 ± 2.3         | 14       |
| 33a        | 9.0 ± 1.8      | 26.6 ± 2.5     | 15.8 ± 3.4         | 16       |
| 33b        | 9.8 ± 0.6      | 19.2 ± 2.0     | 13.8 ± 2.0         | 12       |
| 35a        | 21.2 ± 1.4     | 4.2 ± 0.6      | 12.8 ± 2.3         | 18       |
| 42a        | 21.8 ± 1.3     | 18.7 ± 3.1     | 6.0 ± 0.0          | 12       |
| 42b        | 21.5 ± 2.3     | 6.0 ± 0.0      | 6.0 ± 0.0          | 12       |
| 45a        | 14.7 ± 1.0     | 16.0 ± 0.0     | 17.3 ± 1.4         | 12       |
| 45b        | 4.3 ± 1.1      | 18.3 ± 2.8     | 14.8 ± 2.3         | 13       |
| 47a        | 10.0 ± 0.0     | 18.0 ± 2.7     | 13.0 ± 2.7         | 12       |
| 49a        | 9.7 ± 0.8      | 26.7 ± 2.5     | 18.8 ± 3.6         | 12       |
| 59a        | 12.9 ± 3.1     | 25.2 ± 1.0     | 15.2 ± 1.4         | 15       |
| 63a        | 5.5 ± 2.4      | 26.1 ± 4.0     | 19.0 ± 2.4         | 15       |
| 67b        | 9.7 ± 0.8      | 4.0 ± 0.0      | 15.2 ± 2.3         | 13       |
| 74a        | 26.3 ± 2.1     | 6.0 ± 2.0      | 18.0 ± 1.2         | 13       |
| 82a        | 10.7 ± 1.6     | 15.7 ± 0.8     | 21.0 ± 0.0         | 12       |
| 83a        | 25.1 ± 3.2     | 27.1 ± 2.2     | 12.2 ± 3.0         | 14       |
| 85c        | 21.9 ± 0.5     | 16.4 ± 1.5     | 11.7 ± 2.0         | 18       |
| 94b        | 4.5 ± 0.9      | 14.5 ± 2.3     | 13.0 ± 2.7         | 12       |

Data show the mean and standard deviation of the position of the center of gravity of each AL glomerulus, expressed as distance in  $\mu\text{m}$  from the extreme lateral, ventral, and anterior planes of the whole AL.



**Table S2. Antennal lobe and calyx glomeruli innervated by individual projection neurons**

| AL*                           | Calyx*                | Main OSN sensitivity <sup>†</sup>   | Notes                                                                                                                            | Single clones** | Cells in 2-cell clones** <sup>‡</sup> | Total cells* |
|-------------------------------|-----------------------|-------------------------------------|----------------------------------------------------------------------------------------------------------------------------------|-----------------|---------------------------------------|--------------|
| 1a                            | A4 + L8               |                                     | PN innervates calyx glomerulus A4 and usually L8                                                                                 | 5               | 5                                     | 10           |
| 13a                           | L1                    | alcohol                             | 2 additional 13a PNs innervate a medial calyx glomerulus, possibly M3                                                            | 4               | 5                                     | 9            |
| 22c                           | L4                    | aromatic                            |                                                                                                                                  | 2               | 3                                     | 5            |
| 24a                           | L2                    | aromatic                            |                                                                                                                                  | 3               | 2                                     | 5            |
| 30a                           | L6                    | aromatic                            | PNs from AL glomerulus 30a innervate either L6 or M4 in calyx                                                                    | 2               | 2                                     | 4            |
| 30a                           | M4                    | aromatic                            | PNs from AL glomerulus 30a innervate either L6 or M4 in calyx                                                                    | 2               | 3                                     | 5            |
| 33a                           | I3                    |                                     |                                                                                                                                  | 1               | 4                                     | 5            |
| 33b,47a                       | D1                    | ester (47a)                         |                                                                                                                                  | 2               | 5                                     | 7            |
| 35a                           | V1                    | alcohol, aldehyde, ketone           |                                                                                                                                  | 1               | 6                                     | 7            |
| 42a                           | V9 <sup>¶</sup>       | alcohol, aldehyde, ketone, ester    | V9 newly designated                                                                                                              | 1               | 6                                     | 7            |
| 42b                           | L9 <sup>¶</sup>       | ketone, ester                       | L9 newly designated                                                                                                              | 3               | 1                                     | 4            |
| 45a                           | A3 + L11 <sup>¶</sup> | ketone, ester                       | PN innervates calyx glomerulus A3 and usually L11; L11 newly designated                                                          | 8               | 3                                     | 11           |
| 45b                           | D4                    | aromatic                            | Listed as D4 or D5 by Masuda-Nakagawa et al. (2005)                                                                              | 3               | 9                                     | 12           |
| 49a                           | D3                    |                                     |                                                                                                                                  | 4               | 7                                     | 11           |
| 59a                           | A5 <sup>¶</sup>       | aromatic                            | A5 newly designated                                                                                                              | 4               | 4                                     | 8            |
| 63a                           | V5                    |                                     |                                                                                                                                  | 0               | 2                                     | 2            |
| 67b                           | None                  | alcohol, aldehyde, ketone, aromatic |                                                                                                                                  | 0               | 0                                     | 0            |
| 74a                           | None                  | alcohol                             |                                                                                                                                  | 0               | 0                                     | 0            |
| 82a                           | A1                    |                                     |                                                                                                                                  | 3               | 2                                     | 5            |
| 83a                           | M3                    |                                     |                                                                                                                                  | 2               | 0                                     | 2            |
| 85c                           | L10 <sup>¶</sup>      | alcohol, ketone, ester              | L10 newly designated                                                                                                             | 2               | 2                                     | 4            |
| 94b                           | L3                    | aromatic                            | One 94b PN has no calyx innervation                                                                                              | 3               | 11                                    | 14           |
| Near 59a                      | M6 <sup>¶</sup>       |                                     | Unusual PN, cell body far ventroposteriolateral to other PNs. Axon joins iACT more posterior than other PNs; M6 newly designated | 3               | 0                                     | 3            |
| suboesophageal ganglion (SOG) | V3                    |                                     | Not an olfactory PN; does not arborize in the AL                                                                                 | 0               | 8                                     | 8            |

\*Each row shows the AL and calyx glomeruli that are consistently connected by individual PNs, together with the number of PNs observed to have that pattern of connectivity.

<sup>†</sup>From ref. 1.

<sup>‡</sup>Numbers of cells in clones refer to all GH146-positive cells scored, including the suboesophageal ganglion (SOG) neuron.

<sup>§</sup>Connectivity in 2-cell clones was inferred by comparison with 1-cell clones that labeled the same AL and calyx glomeruli.

<sup>¶</sup>These calyx glomeruli are newly designated in this work.

1. Kreher SA, Mathew D, Kim J, Carlson JR (2008) Translation of sensory input into behavioral output via an olfactory system. *Neuron* 59:110–124.

Table S3. Analysis of individual PN clones

| Cell    | No. cells | AL1     | AL2     | Cx1                 | Cx2      | Notes                                                          |
|---------|-----------|---------|---------|---------------------|----------|----------------------------------------------------------------|
| 011R    | 1         | 1a      |         | A4                  |          |                                                                |
| 017R    | 1         | 1a      |         | A4                  |          |                                                                |
| 128L    | 1         | 1a      |         | A4                  |          |                                                                |
| 131L    | 1         | 1a      |         | A4 + L8             |          |                                                                |
| 042R I  | 2         | 1a      | 33b-47a | A4                  | D1       |                                                                |
| 071R I  | 2         | 1a      | 49a     | A4 + L8             | D3       |                                                                |
| 141R    | 1         | 1a      |         | A4                  |          |                                                                |
| 125L I  | 2         | 1a      | 33a     | A4 + L8             | I3       |                                                                |
| 130L I  | 2         | 1a      | 45b     | A4 + L8             | D4       | A 3rd weak PN, not analyzed                                    |
| 130R II | 2         | 1a      | 42a     | A4 + L8             | V9       |                                                                |
| 010L    | 1         | 13a     |         | medial, possibly M3 |          | AL-Cx match not consistent with other 13a-L1 PNs               |
| 022R    | 1         | 13a     |         | L1                  |          |                                                                |
| 063R    | 1         | 13a     |         | L1                  |          |                                                                |
| 072L    | 1         | 13a     |         | L1                  |          |                                                                |
| 009L II | 2         | 13a     | 33a     | L1                  | I3       |                                                                |
| 155R    | 1         | 13a     |         | L1                  |          |                                                                |
| 033R I  | 2         | 13a     | 59a     | L1                  | A5       |                                                                |
| 095R I  | 2         | 13a     | 45b     | L1                  | D4       |                                                                |
| 100L I  | 2         | 13a     | 94b     | L1                  | L3       |                                                                |
| 127L I  | 2         | 13a     | 59a     | L1                  | A5       |                                                                |
| 145R II | 2         | 13a     | 94b     | medial, possibly M3 | L3       | AL-Cx match not consistent with other 13a-L1 PNs               |
| 007L    | 1         | 22c     |         | L4                  |          |                                                                |
| 048R    | 1         | 22c     |         | L4                  |          |                                                                |
| 041R II | 2         | 22c     | 33b-47a | L4                  | D1       |                                                                |
| 079L II | 2         | 22c     | 82a     | L4                  | A1       |                                                                |
| 149R II | 2         | 22c     | 59a     | L4                  | A5       |                                                                |
| 098R    | 1         | 24a     |         | L2                  |          |                                                                |
| 101L    | 1         | 24a     |         | L2                  |          |                                                                |
| 120L    | 1         | 24a     |         | L2                  |          |                                                                |
| 121R I  | 2         | 24a     | SOG     | L2                  | V3       |                                                                |
| 123R II | 2         | 24a     | 45b     | L2                  | D4       |                                                                |
| 036R    | 1         | 30a     |         | L6                  |          | PN also appears to have a small ventromedial terminal in calyx |
| 094Rb   | 1         | 30a     |         | L6                  |          |                                                                |
| 103R    | 1         | 30a     |         | M4                  |          |                                                                |
| 112R    | 1         | 30a     |         | M4                  |          |                                                                |
| 019R II | 2         | 30a     | 49a     | M4                  | D3       |                                                                |
| 074R II | 2         | 30a     | 49a     | M4                  | D3       |                                                                |
| 093R I  | 2         | 30a     | 94b     | L6                  | L3       |                                                                |
| 124R I  | 2         | 30a     | SOG     | L6                  | V3       |                                                                |
| 150R II | 2         | 30a     | 94b     | M4                  | L3       |                                                                |
| 150L    | 1         | 33a     |         | I3                  |          |                                                                |
| 009L I  | 2         | 33a     | 13a     | I3                  | L1       |                                                                |
| 062R II | 2         | 33a     | 59a     | I3                  | A5       |                                                                |
| 122L II | 2         | 33a     | 42a     | I3                  | V9       |                                                                |
| 125L II | 2         | 33a     | 1a      | I3                  | A4 + L8  |                                                                |
| 004L    | 1         | 33b-47a |         | D1                  |          |                                                                |
| 072R    | 1         | 33b-47a |         | D1                  |          |                                                                |
| 041R I  | 2         | 33b-47a | 22c     | D1                  | L4       |                                                                |
| 042R II | 2         | 33b-47a | 1a      | D1                  | A4       |                                                                |
| 043R I  | 2         | 33b-47a | 49a     | D1                  | D3       |                                                                |
| 062L II | 2         | 33b-47a | 45b     | D1                  | D4       |                                                                |
| 142R I  | 2         | 33b-47a | 94b     | D1                  | L3       |                                                                |
| 147R    | 1         | 35a     |         | V1                  |          |                                                                |
| 014R II | 2         | 35a     | 45b     | V1                  | D4       |                                                                |
| 020L I  | 2         | 35a     | 45a     | V1                  | A3 + L11 |                                                                |
| 037L I  | 2         | 35a     | 63a     | V1                  | V5       |                                                                |
| 068L I  | 2         | 35a     | 42a     | V1                  | V9       |                                                                |
| 126L I  | 2         | 35a     | SOG     | V1                  | V3       |                                                                |
| 098L I  | 2         | 35a     | SOG     | V1                  | V3       |                                                                |
| 146R    | 1         | 42a     |         | V9                  |          |                                                                |
| 013L I  | 2         | 42a     | SOG     | V9                  | V3       |                                                                |
